# Supplementary material for: A solution-processable benzothiazole-substituted formazanate zinc(ii) complex designed for a robust resistive memory device
Source: Royal Society of Chemistry journal article supplement (doi:10.1039/d4dt01640h), 2024-01-01
Supplement: d4dt01640h1.pdf [file d4dt01640h1.pdf]

**Solution-Processable Benzothiazole-Substituted Formazanate Zinc(II)  
Complex Designed for Robust Resistive Memory Device**

*Sunita Birara*<sup>[a]</sup>, *Shalu Saini*<sup>[b]</sup>, *Moumita Majumder*<sup>\*[c]</sup>, *Shree Prakash Tiwari*<sup>\*[b]</sup>, *Ramesh K.*

*Metre*<sup>\*[a]</sup>

[a] Department of Chemistry, Indian Institute of Technology Jodhpur, Rajasthan- 342030, India

[b] Department of Electrical Engineering, Indian Institute of Technology Jodhpur, Rajasthan- 342030,  
India

[c] Department of Chemistry, School of Science and Environmental Studies, Dr. Vishwanath Karad  
MIT World Peace University, Pune 411038, Maharashtra, India.

**RECEIVED DATE (to be automatically inserted after your manuscript is accepted if  
required according to the journal that you are submitting your paper to)**

CORRESPONDING AUTHOR FOOTNOTE: \* To whom correspondence should be  
addressed. E-mail: [rkmetre@iitj.ac.in](mailto:rkmetre@iitj.ac.in) Phone (*Office*): (+91) 291-280-1309; [sptiwari@iitj.ac.in](mailto:sptiwari@iitj.ac.in)

Phone (*Office*): +91 291 280 1356; [moumita83iitd@gmail.com](mailto:moumita83iitd@gmail.com)

## Table of Contents

|                                                                                                                                               |     |
|-----------------------------------------------------------------------------------------------------------------------------------------------|-----|
| Crystal data and structure refinement for <b>1</b> .....                                                                                      | 3   |
| <sup>1</sup> H and <sup>13</sup> C{ <sup>1</sup> H} NMR spectra of LH and <b>1</b> .....                                                      | 4-5 |
| HRMS analysis for LH and <b>1</b> .....                                                                                                       | 6   |
| Thermogravimetric analysis of <b>1</b> .....                                                                                                  | 7   |
| Elemental analysis of <b>1</b> .....                                                                                                          | 7   |
| Supramolecular studies of <b>1</b> .....                                                                                                      | 8   |
| Experimental and Computed absorption spectra of [ML <sub>2</sub> ], complex <b>1</b> .....                                                    | 9   |
| BP86 computed frontier molecular orbitals of the Zn-metal complex <b>1</b> and uncoordinated benzothiazole-substituted formazan ligand.....   | 10  |
| Molecular orbital energy levels and energy band gap of <b>1</b> .....                                                                         | 11  |
| Second order perturbation energy E <sub>2</sub> (kcal/mol), off-diagonal Fock matrix elements F(i,j) and acceptor – donor energy values ..... | 12  |
| TD-DFT computed electronic transition energy, oscillator strength, and transition characters .....                                            | 12  |

**Table S1. Crystal data and structure refinement for 1 (CCDC 2356039).**

| <b>Identification code</b>                                | <b>1</b>                                                     |
|-----------------------------------------------------------|--------------------------------------------------------------|
| <b>Empirical formula</b>                                  | $C_{54}H_{34}Cl_2N_{10}O_2S_2Zn$                             |
| <b>Formula weight</b>                                     | 1055.30                                                      |
| <b>Temperature/K</b>                                      | 100                                                          |
| <b>Crystal system</b>                                     | monoclinic                                                   |
| <b>Space group</b>                                        | $P2_1/n$                                                     |
| <b>a (Å)</b>                                              | 11.2270(4)                                                   |
| <b>b (Å)</b>                                              | 31.2653(9)                                                   |
| <b>c (Å)</b>                                              | 14.0665(5)                                                   |
| <b><math>\alpha</math> (°)</b>                            | 90                                                           |
| <b><math>\beta</math> (°)</b>                             | 111.5770(10)                                                 |
| <b><math>\gamma</math> (°)</b>                            | 90                                                           |
| <b>Volume (Å<sup>3</sup>)</b>                             | 4591.6(3)                                                    |
| <b>Z</b>                                                  | 4                                                            |
| <b><math>\rho_{calc}</math> g·cm<sup>-3</sup></b>         | 1.527                                                        |
| <b><math>\mu</math>, mm<sup>-1</sup></b>                  | 0.800                                                        |
| <b>F(000)</b>                                             | 2160.0                                                       |
| <b>Crystal size (mm<sup>3</sup>)</b>                      | 0.26 × 0.23 × 0.22                                           |
| <b>Radiation</b>                                          | MoK $\alpha$ ( $\lambda = 0.71073$ )                         |
| <b>2<math>\theta</math> range for data collection (°)</b> | 4.114 to 56.582                                              |
| <b>Index ranges</b>                                       | $-14 \leq h \leq 14, -38 \leq k \leq 41, -18 \leq l \leq 18$ |
| <b>Reflections collected</b>                              | 78484                                                        |
| <b>Independent reflections</b>                            | 11378 [ $R_{int} = 0.0434, R_{sigma} = 0.0275$ ]             |
| <b>Data/restraints/parameters</b>                         | 11378/0/640                                                  |
| <b>Goodness-of-fit on F<sup>2</sup></b>                   | 1.050                                                        |
| <b>Final R indexes [<math>I \geq 2\sigma(I)</math>]</b>   | $R_1 = 0.0373, wR_2 = 0.0887$                                |
| <b>Final R indexes [all data]</b>                         | $R_1 = 0.0459, wR_2 = 0.0925$                                |
| <b>Largest diff. peak/hole (e Å<sup>-3</sup>)</b>         | 0.67/-0.46                                                   |

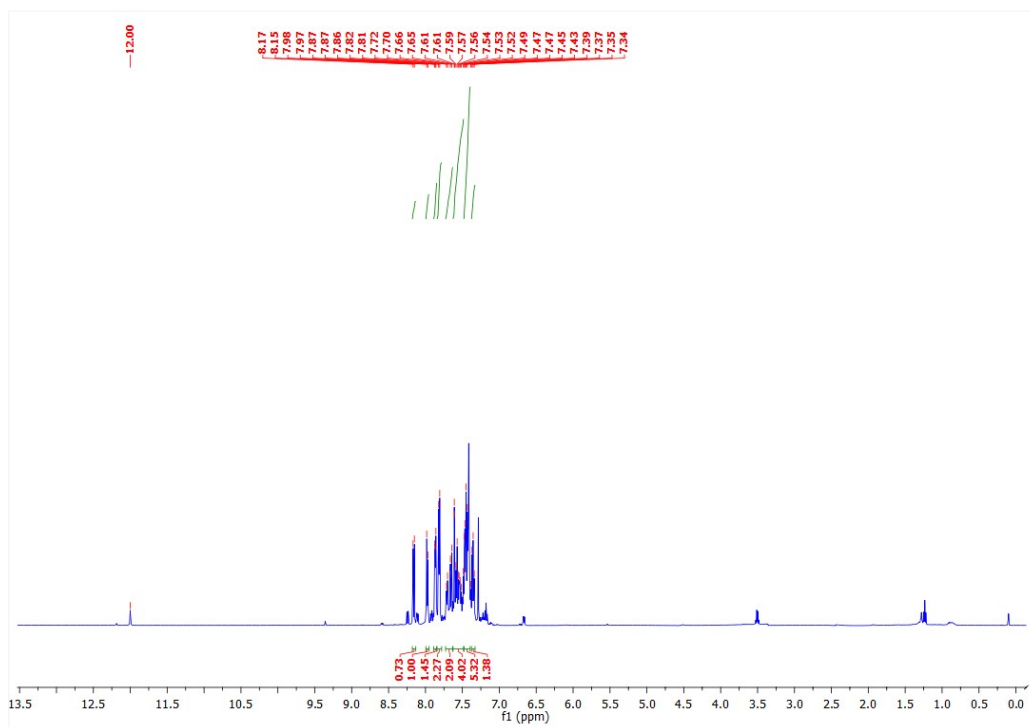

Figure S1.  $^1\text{H}$  NMR of LH in  $\text{CDCl}_3$ .

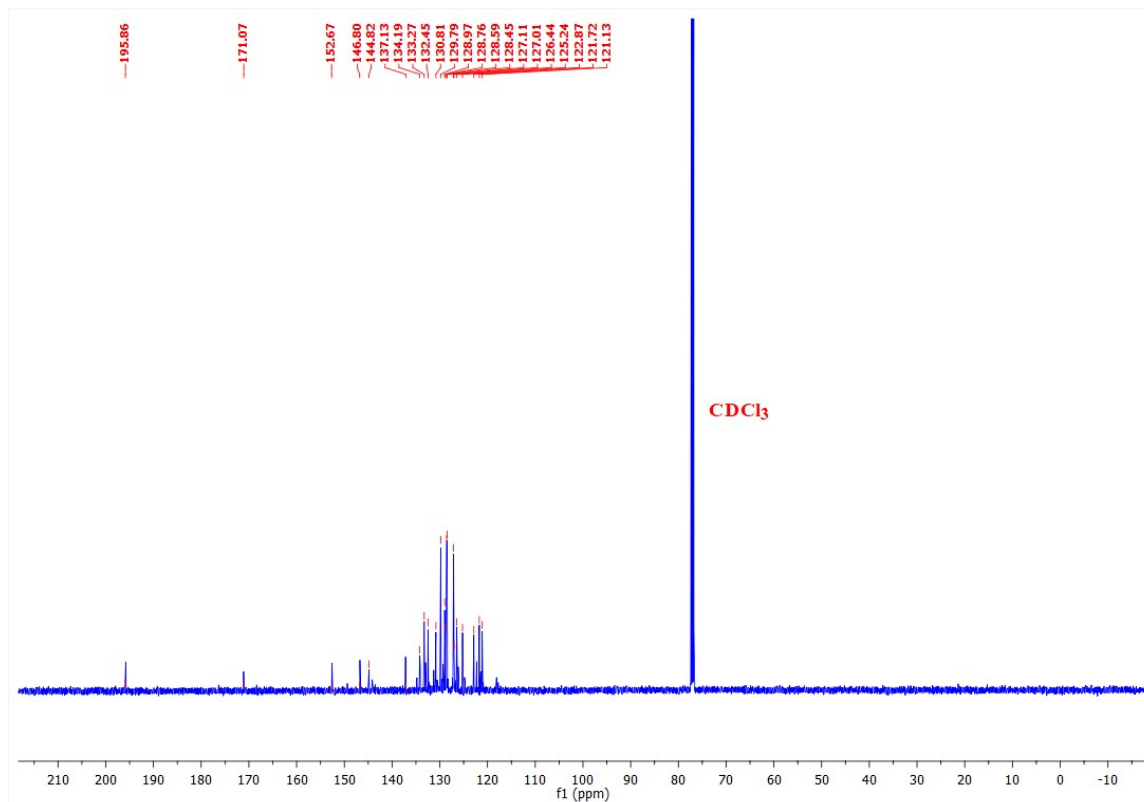

Figure S2.  $^{13}\text{C}\{^1\text{H}\}$  NMR of LH in  $\text{CDCl}_3$ .

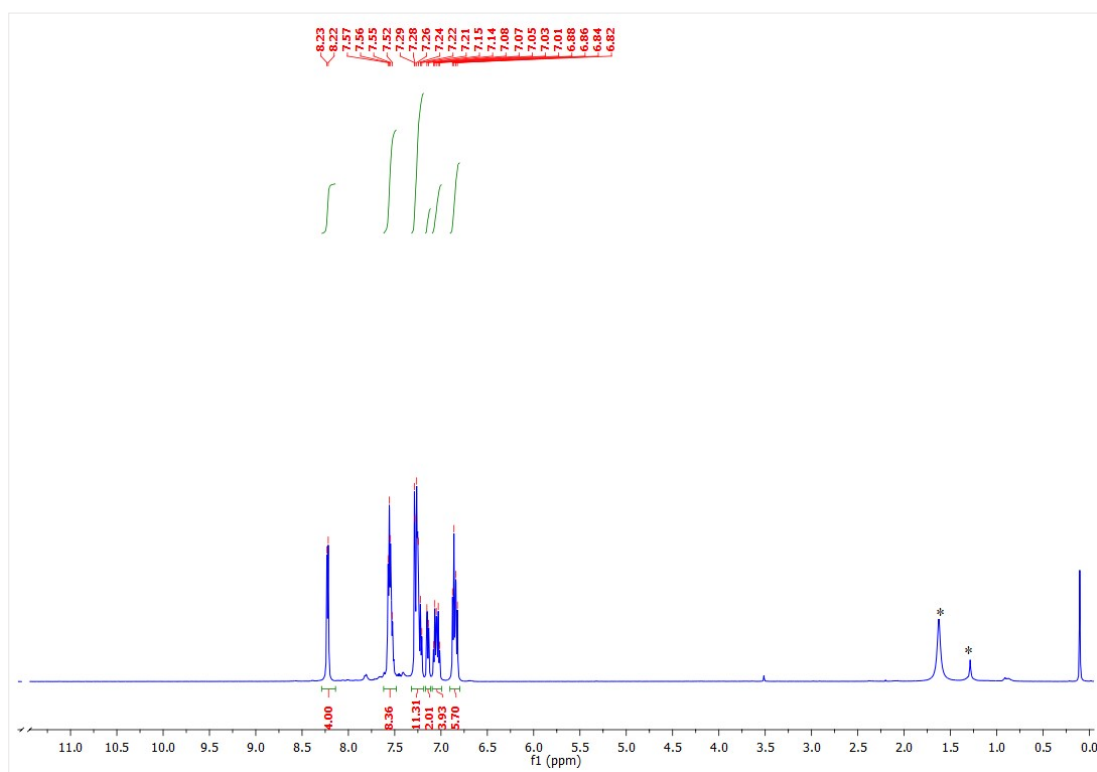

Figure S3.  $^1\text{H}$  NMR (500 MHz,  $\text{CDCl}_3$ ) of complex **1**.

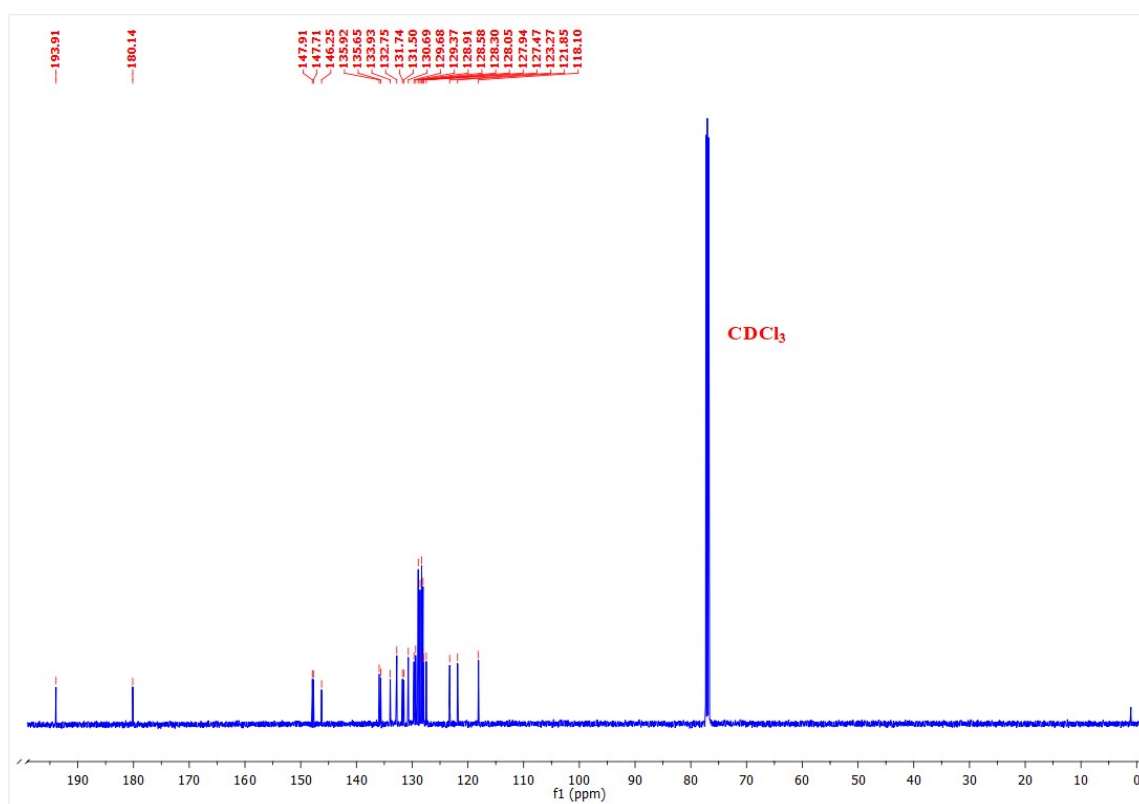

Figure S4.  $^{13}\text{C}$  NMR (126 MHz,  $\text{CDCl}_3$ ) of complex **1**.

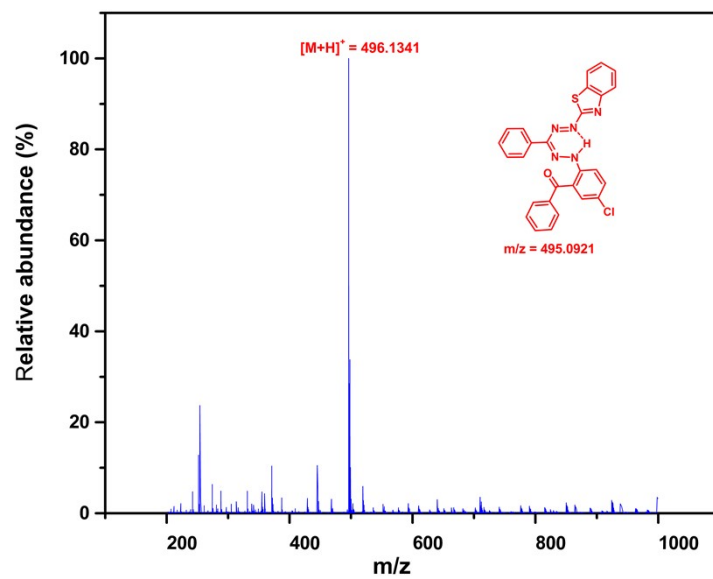

**Figure S5.** HRMS analysis for **LH**: Anal. Calcd. for  $[M+H]^+$  peak,  $m/z = 496.0921$ . Found  $[M+H]^+$  peak,  $m/z = 496.1341$ .

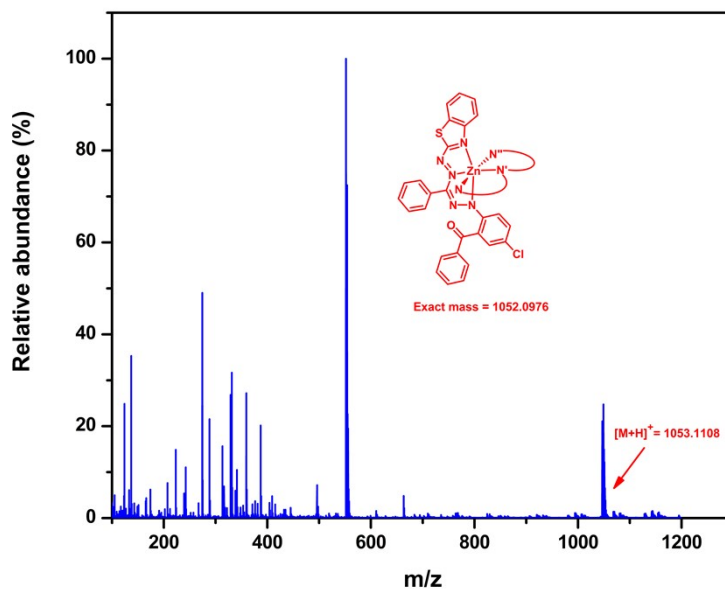

**Figure S6.** HRMS analysis for **1**: Anal. Calcd. for  $[M+H]^+$  peak,  $m/z = 1053.1048$ . Found  $[M+H]^+$  peak,  $m/z = 1053.1108$ .

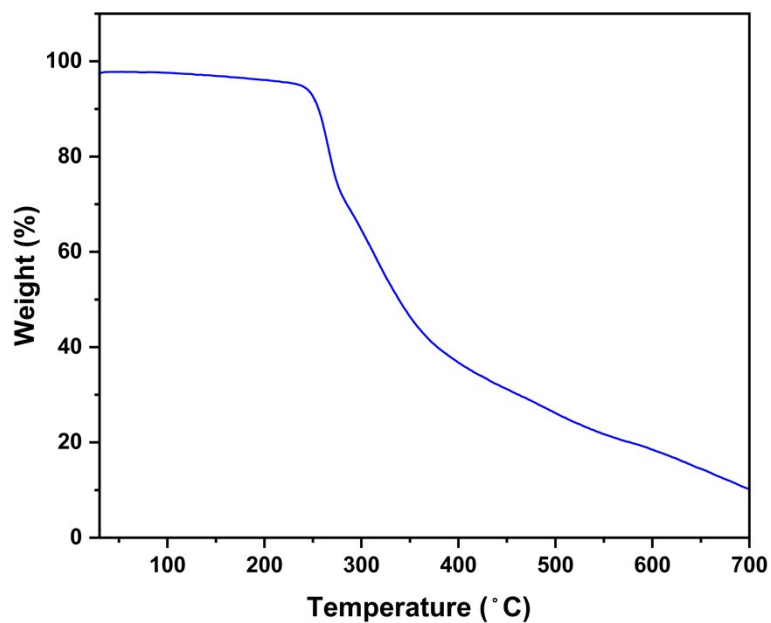

**Figure S7.** Thermogravimetric analysis of **1**.

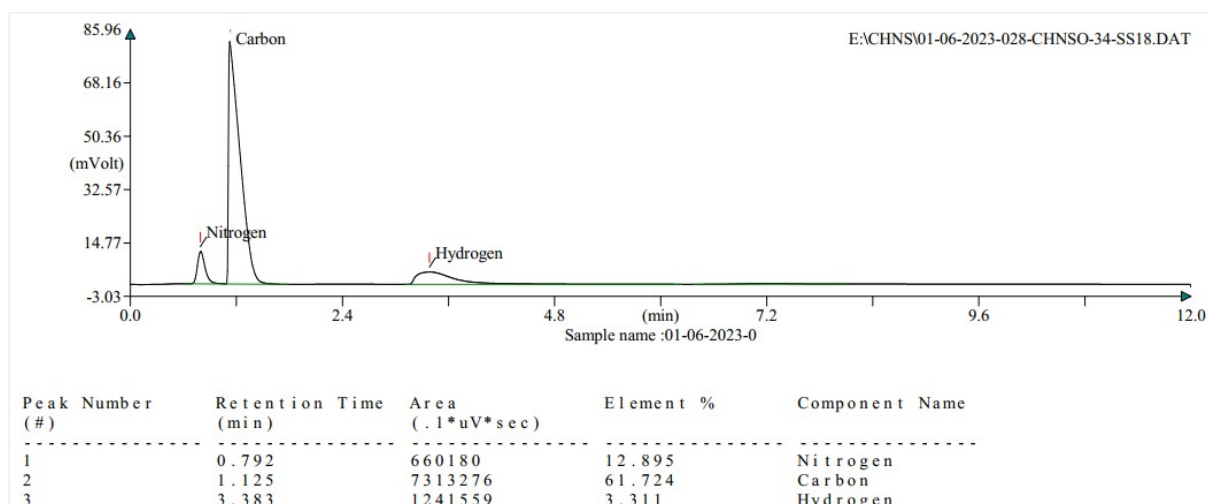

**Figure S8.** Elemental analysis of **1**. Anal. Calcd. (%) for  $C_{54}H_{34}Cl_2N_{10}O_2S_2Zn$ : C, 61.46; H, 3.25; N, 13.27. Found: C, 61.72; H, 3.31; N, 12.89.

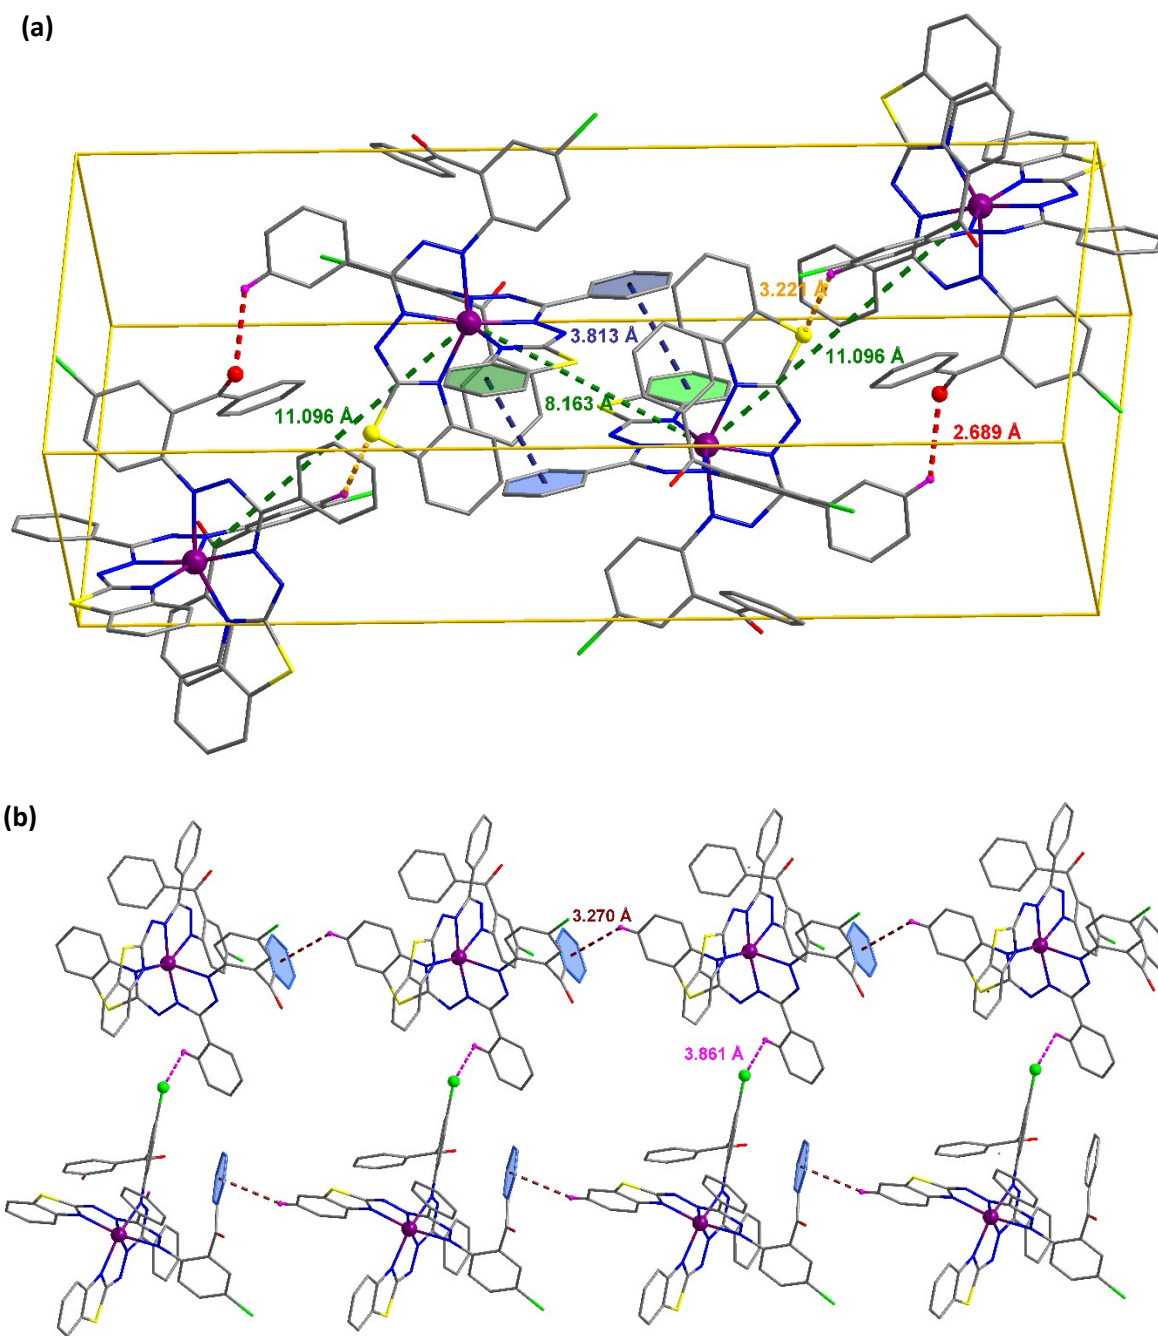

**Figure S9.** (a) Unit cell of complex **1** displaying CH--O, CH--S, and  $\pi$ -- $\pi$  interactions. (b) Crystal packing mode in **1** displaying CH-- $\pi$  and CH--Cl interactions.



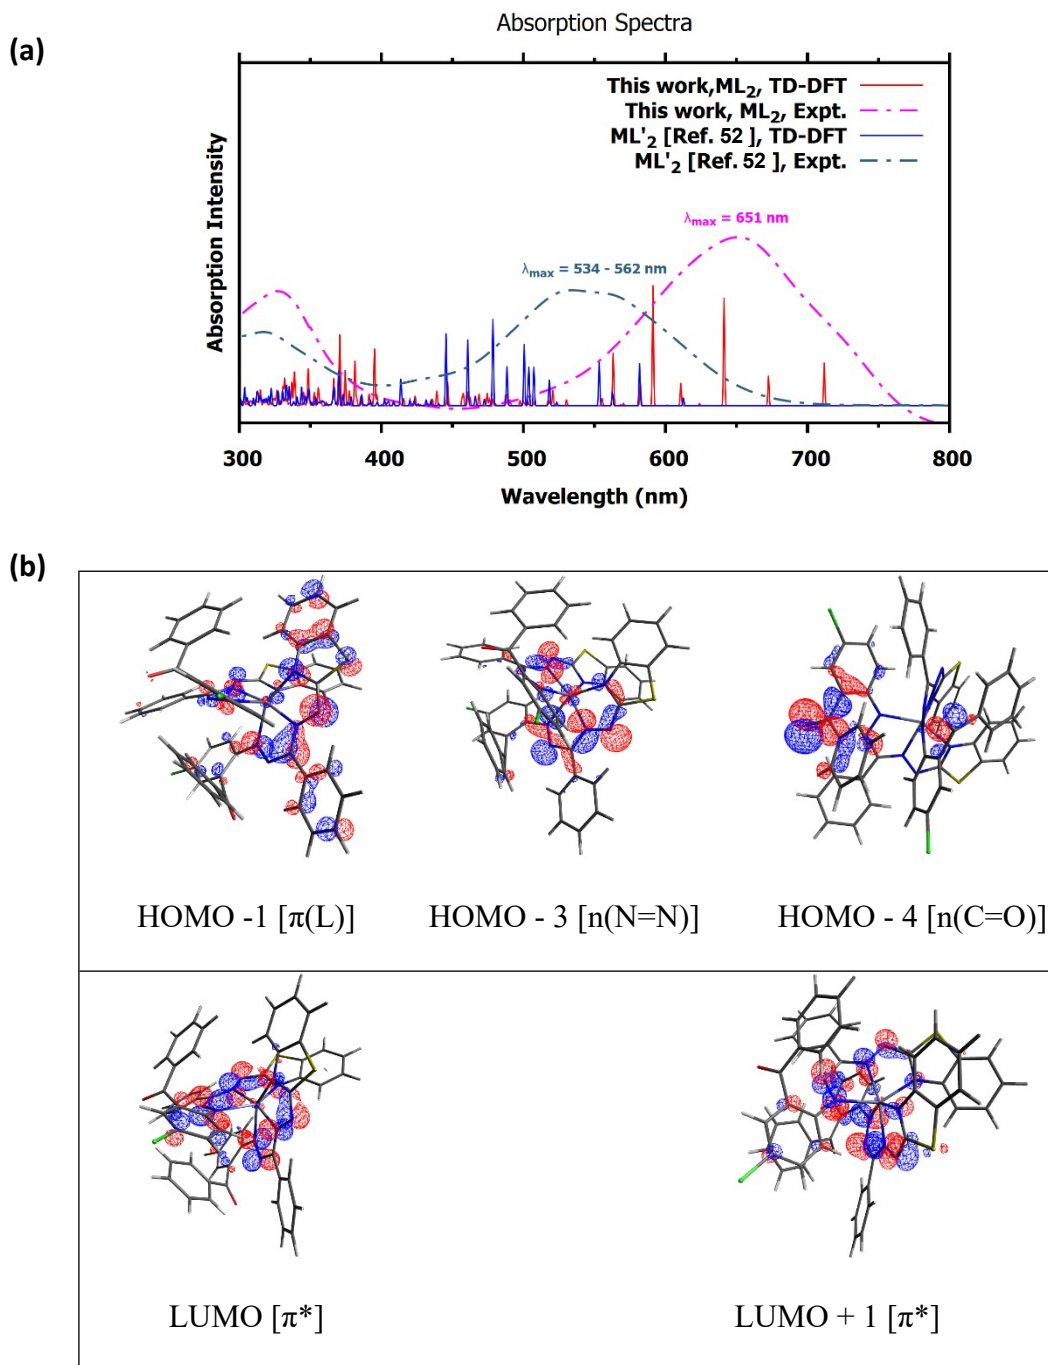

**Figure S10.** (a) Experimental and Computed absorption spectra of  $[ML_2]$ , complex **1** (This work), and  $[ML'_2]$  complex [Ref. 52 in main manuscript] (Previous work) in  $CHCl_3$  solution where  $M = Zn$ . (b) The molecular orbital representations of electronic transition that appear at the wavelength range from 590–650 nm (oscillator strength = 0.37-0.42) of TD-DFT computed absorption spectrum of complex **1** in  $CHCl_3$  solvent. A contour value of 0.04 au is used to generate the plots.

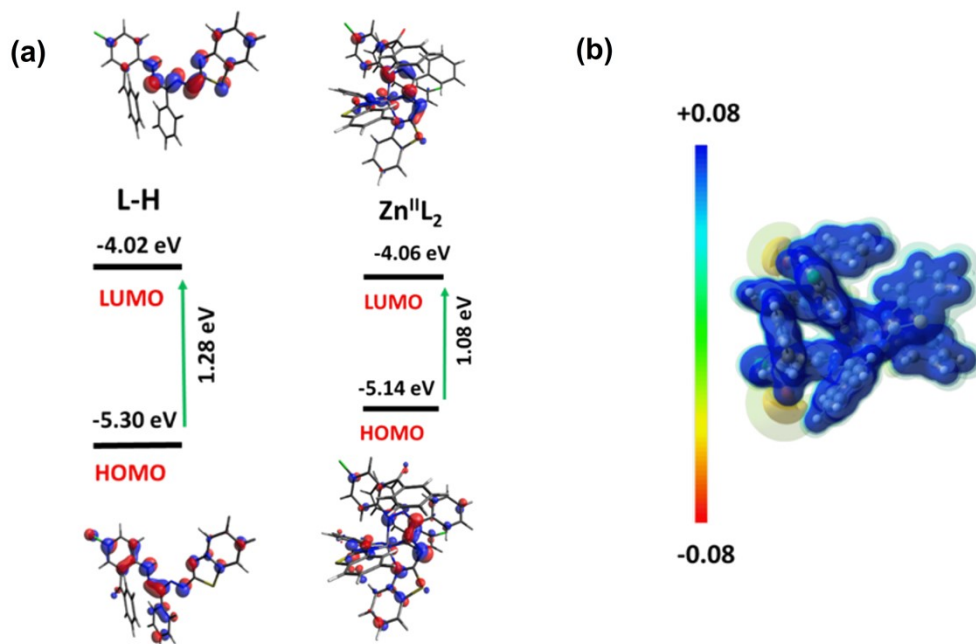

**Figure S11.** (a) BP86 computed frontier molecular orbitals of the Zn-metal complex **1** and uncoordinated benzothiazole-substituted formazan ligand (LH) are plotted with an isosurface value of 0.04 au. (b) The molecular electrostatic potential surface (isovalue: 0.025, 0.05, 0.08) of complex **1**, the positive and negative ESP regions are represented by blue and red colors, respectively.

## Calculation of molecular orbital energy levels using electrochemical studies of complex

1:

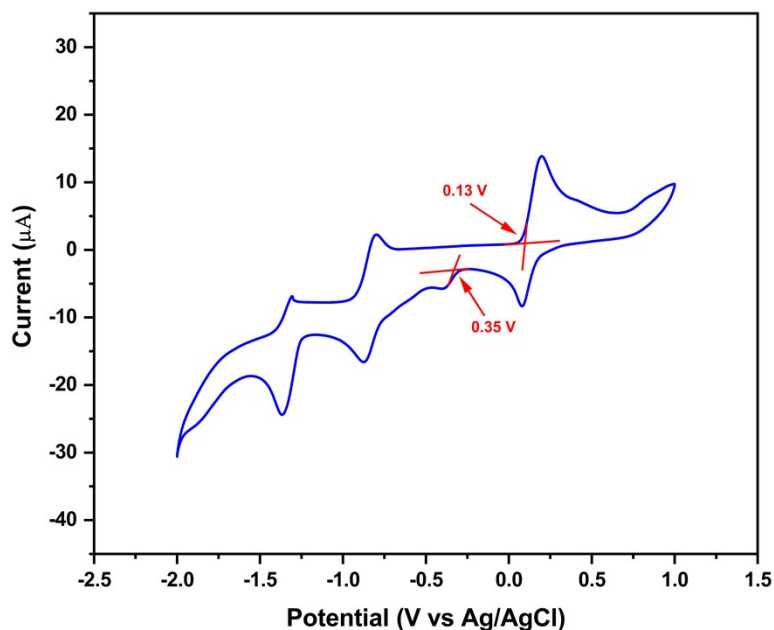

**Figure S13.** CV of the complex **1** at a scan rate of 10 mV/s acquired using a Pt-wire counter electrode, glassy carbon working electrode, and Ag/AgCl (3.0 M KCl) reference electrode.

$$E_{\text{HOMO}} = -[E_{\text{onset}}(\text{oxidation}) + 4.8 - E_{\text{FOC}}] \quad \text{S2}$$

$$E_{\text{LUMO}} = -[E_{\text{onset}}(\text{reduction}) + 4.8 - E_{\text{FOC}}] \quad \text{S3}$$

$E_{\text{HOMO}}$  and  $E_{\text{LUMO}}$  are the HOMO and LUMO energy levels,  $E_{\text{onset}}(\text{oxidation})$  is the onset oxidation potential of complex **1**, 4.8 is the reference energy level of ferrocene (FOC, 4.8 eV below the vacuum level), and  $E_{\text{FOC}}$  is the potential of FOC/FOC<sup>+</sup> vs. Ag/AgCl (0.33 eV, as measured by cyclic voltammetry).

$$E_{\text{HOMO}} = -[0.13 + 4.8 - 0.33]$$

$$= -4.6 \text{ eV}$$

$$E_{\text{LUMO}} = -[-0.35 + 4.8 - 0.33]$$

$$= -4.12 \text{ eV}$$

**Table S2.** Second-order perturbation energy  $E_2$  (eV), off-diagonal Fock matrix elements  $F(i,j)$  and acceptor – donor energy values ( $E_j - E_i$ ) (a.u.) of selected donor-acceptor NBO-NBO\* interactions in metal-complex **1**, as computed at BP86+D3/TZVPP+SDD method.  $E_2 > 1.0$  kcal/mol are tabulated here

| Donor NBO (i)           | Acceptor NBO(j) | $E_2$ (kcal/mol) | $E_j - E_i$ (au) | $F(i,j)$      |
|-------------------------|-----------------|------------------|------------------|---------------|
| <b>Ligand-to-Metal</b>  |                 |                  |                  |               |
| LP(1)N                  | LP*(1)Zn        | 29.57 - 34.77    | 0.36 - 0.39      | 0.094 - 0.101 |
| <b>Ligand-to-Ligand</b> |                 |                  |                  |               |
| LP(2)S                  | $\pi^*(N-C)$    | 29.02            | 0.17             | 0.062         |
| LP(2)S                  | $\pi^*(C-C)$    | 17.26            | 0.20             | 0.053         |
| LP(3)Cl                 | $\pi^*(C-C)$    | 14.35            | 0.25             | 0.054         |
| LP(1)N                  | $\pi^*(N-N)$    | 1.64             | 0.24             | 0.018         |
| LP(1)N                  | $\pi^*(C-C)$    | 1.43             | 0.33             | 0.019         |
| LP(1)N                  | $\pi^*(O-C)$    | 5.39             | 0.30             | 0.036         |
| LP(1)N                  | $\pi^*(N-C)$    | 1.38             | 0.24             | 0.016         |
| $\pi(O-C)$              | $\pi^*(C-C)$    | 4.76             | 0.33             | 0.035         |
| $\pi(N-N)$              | C(LP*)          | 41.10, 28.03     | 0.19, 0.22       | 0.079,0.069   |
| $\pi(N-N)$              | $\pi^*(N-N)$    | 1.36, 19.95      | 0.23, 0.26       | 0.016, 0.064  |
| $\pi(N-N)$              | $\pi^*(C-C)$    | 10.28            | 0.33             | 0.052         |
| $\pi(N-C)$              | $\pi^*(N-N)$    | 8.72             | 0.22             | 0.039         |
| $\pi(N-C)$              | $\pi^*(C-C)$    | 17.98            | 0.28             | 0.063         |
| $\pi(C-C)$              | $\pi^*(O-C)$    | 17.12,4.09       | 0.21             | 0.053         |
| $\pi(C-C)$              | $\pi^*(N-N)$    | 16.49            | 0.15             | 0.010         |
| $\pi(C-C)$              | $\pi^*(C-C)$    | 11.51 – 19.07    | 0.24 – 0.21      | 0.047-0.056   |
| $\pi(C-C)$              | $\pi^*(N-C)$    | 9.57             | 0.19             | 0.038         |
| $\pi(C-C)$              | LP*C18          | 65.90            | 0.09             | 0.069         |
|                         |                 |                  |                  |               |

**Table S3:** Calculated TD-DFT electronic transition wavelength (nm), oscillator strength ( $f_{osc}$ ), major compositions in terms MO contributions, and electronic transition character for complex **1** ( $Zn^{II}L_2$ )

| S. no.           | Wavelength (nm) | $f_{osc}$ | Major composition                      | Transition Character           |
|------------------|-----------------|-----------|----------------------------------------|--------------------------------|
| <b>Complex 1</b> |                 |           |                                        |                                |
| 1.               | 712             | 0.15      | (HOMO-2) $\rightarrow$ LUMO            | $n \rightarrow \pi^*$          |
| 2.               | 673             | 0.10      | (HOMO-2) $\rightarrow$ LUMO            | $n \rightarrow \pi^*$          |
| 3.               | 641             | 0.37      | (HOMO-1) + (HOMO-3) $\rightarrow$ LUMO | $n + \pi(L) \rightarrow \pi^*$ |
| 4.               | 611             | 0.08      | (HOMO-2) $\rightarrow$ LUMO+1          | $n \rightarrow \pi^*$          |

|    |     |      |                                                            |                                                          |
|----|-----|------|------------------------------------------------------------|----------------------------------------------------------|
| 5. | 591 | 0.42 | (HOMO-1) + (HOMO-3) → LUMO<br>(HOMO-1) + (HOMO-4) → LUMO+1 | $n + \pi (L) \rightarrow \pi^*$<br>$n \rightarrow \pi^*$ |
| 6. | 582 | 0.18 | (HOMO-3) → (LUMO+1)                                        | $n \rightarrow \pi^*$                                    |
| 7. | 555 | 0.03 | (HOMO-7) → LUMO + (LUMO+1)                                 | $S(LP)+\pi \rightarrow \pi^*$                            |
| 8. | 530 | 0.02 | (HOMO-6) → LUMO + (LUMO+1)                                 | $S(LP)+\pi \rightarrow \pi^*$                            |

---
